# Supplementary material for: Filamentous sludge bulking control by nano zero-valent iron in activated sludge treatment systems
Source: Royal Society of Chemistry journal article supplement (doi:10.1039/c4em00333k), 2014-01-01
Supplement: c4em00333k1.pdf [file c4em00333k1.pdf]

**Filamentous sludge bulking control by nano zero-valent iron in activated sludge  
treatment systems**

Shengnan Xu<sup>†</sup>, Minghao Sun<sup>†</sup>, Chiqian Zhang<sup>†</sup>, Rao Surampalli<sup>‡</sup> and Zhiqiang Hu<sup>†\*</sup>

<sup>†</sup>Department of Civil and Environmental Engineering, University of Missouri

<sup>‡</sup>US Environmental Protection Agency, Kansas City, KS 66101

Supporting Information

Table S1. Primer used for filamentous bacteria detection

| Target                                  | Primer          | Sequence (5'-3')         | References                |
|-----------------------------------------|-----------------|--------------------------|---------------------------|
| Most 021 N group strains                | 21Nf            | CGTAGGCGGCTCTTTAAGTCRGAT | (Vervaeren et al., 2005)  |
| Most 021 N group strains                | 21Nr            | CCGACGGCTAGTTGACATCGTTTA | (Vervaeren et al., 2005)  |
| <i>Gordonia</i> spp.                    | G268f           | CGACCTGAGAGGGTGATCG      | (Nielsen et al., 2004)    |
| <i>Gordonia</i> spp                     | G1096r          | ATAACCCGCTGGCAATACAG     | (Nielsen et al., 2004)    |
| <i>Candidatus Microthrix parvicella</i> | M1f             | GGTGTGGGGAGAACTCAACTC    | (Kumari et al., 2009)     |
| <i>Candidatus Microthrix parvicella</i> | M2r             | GACCCCGAAGGACACCG        | (Kumari et al., 2009)     |
| <i>T.eikelboomii</i> AP3                | Cpn60<br>49/50f | ATAATAATGCGATTGCTCAAG    | (Dumonceaux et al., 2006) |
| <i>T.eikelboomii</i> AP3                | Cpn60<br>49/50r | ACGACTAAAGTGGCTAAGG      | (Dumonceaux et al., 2006) |
| Bacterial 16S rRNA                      | 1055f           | ATGGCTGTCGTCAGCT         | (Harms et al., 2003)      |
| Bacterial 16S rRNA                      | 1392r           | ACGGGCGGTGTGTAC          | (Harms et al., 2003)      |

Table S2. Primer used for nitrifiers in this study

| Target                     | Primer    | Sequence (5'-3')               | References                |
|----------------------------|-----------|--------------------------------|---------------------------|
| Bacterial 16S rRNA         | Eub338f   | (6-FAM)-<br>ACTCCTACGGGAGGCAGC | (Amann et al., 1990)      |
| AOB 16S rRNA               | Nso1225r  | CGCCATTGTATTACGTGTGA           | (Mobarry et al.,<br>1996) |
| <i>Nitrospira</i> 16S rRNA | Ntspa685r | CGGGAATTCCGCGCTC               | (Regan et al., 2002)      |

Table S3. Primer and DNA Concentrations used in q-PCR

| Methods                   | Component in one well                 | Stock Conc.               | Volume per rxn ( $\mu\text{L}$ /well) | Final Conc in a 25- $\mu\text{L}$ PCR rxn |
|---------------------------|---------------------------------------|---------------------------|---------------------------------------|-------------------------------------------|
| SYBR Green <sup>1</sup>   | F/ R Primer                           | 10 $\mu\text{M}$          | 1                                     | 0.4 $\mu\text{M}$                         |
|                           | DNA Template (with 100 time dilution) | 0.9-2.3 ng/ $\mu\text{L}$ | 5                                     | 0.2-0.5 ng/ $\mu\text{L}$                 |
|                           | SYBR PCR Mix                          | X                         | 12.5                                  | 0.5 X                                     |
|                           | PCR grade water                       |                           | 3.75                                  |                                           |
|                           | EDTA                                  | 10 mM                     | 1.25                                  | 0.5 mM                                    |
|                           | MgCl <sub>2</sub>                     | 25 mM                     | 0.5                                   | 0.5 mM                                    |
|                           |                                       |                           |                                       |                                           |
| Taqman Probe <sup>2</sup> | F/ R Primer                           | 10 $\mu\text{M}$          | 1                                     | 0.4 $\mu\text{M}$                         |
|                           | Probe                                 | 10 $\mu\text{M}$          | 0.5                                   | 0.2 $\mu\text{M}$                         |
|                           | DNA Template (with 100 time dilution) | 0.9-2.3 ng/ $\mu\text{L}$ | 5                                     | 0.2-0.5 ng/ $\mu\text{L}$                 |
|                           | Tapman PCR Mix                        | X                         | 12.5                                  | 0.5 X                                     |
|                           | PCR grade water                       |                           | 3.25                                  |                                           |
|                           | EDTA                                  | 10 mM                     | 1.25                                  | 0.5 mM                                    |
|                           | MgCl <sub>2</sub>                     | 25 mM                     | 0.5                                   | 0.5 mM                                    |

<sup>1</sup> SYBR green method was for Type 021N and total PCR volume was 25  $\mu\text{L}$ .

<sup>2</sup> Taqman probe method was used for total bacteria determination and total PCR volume was 25  $\mu\text{L}$ .

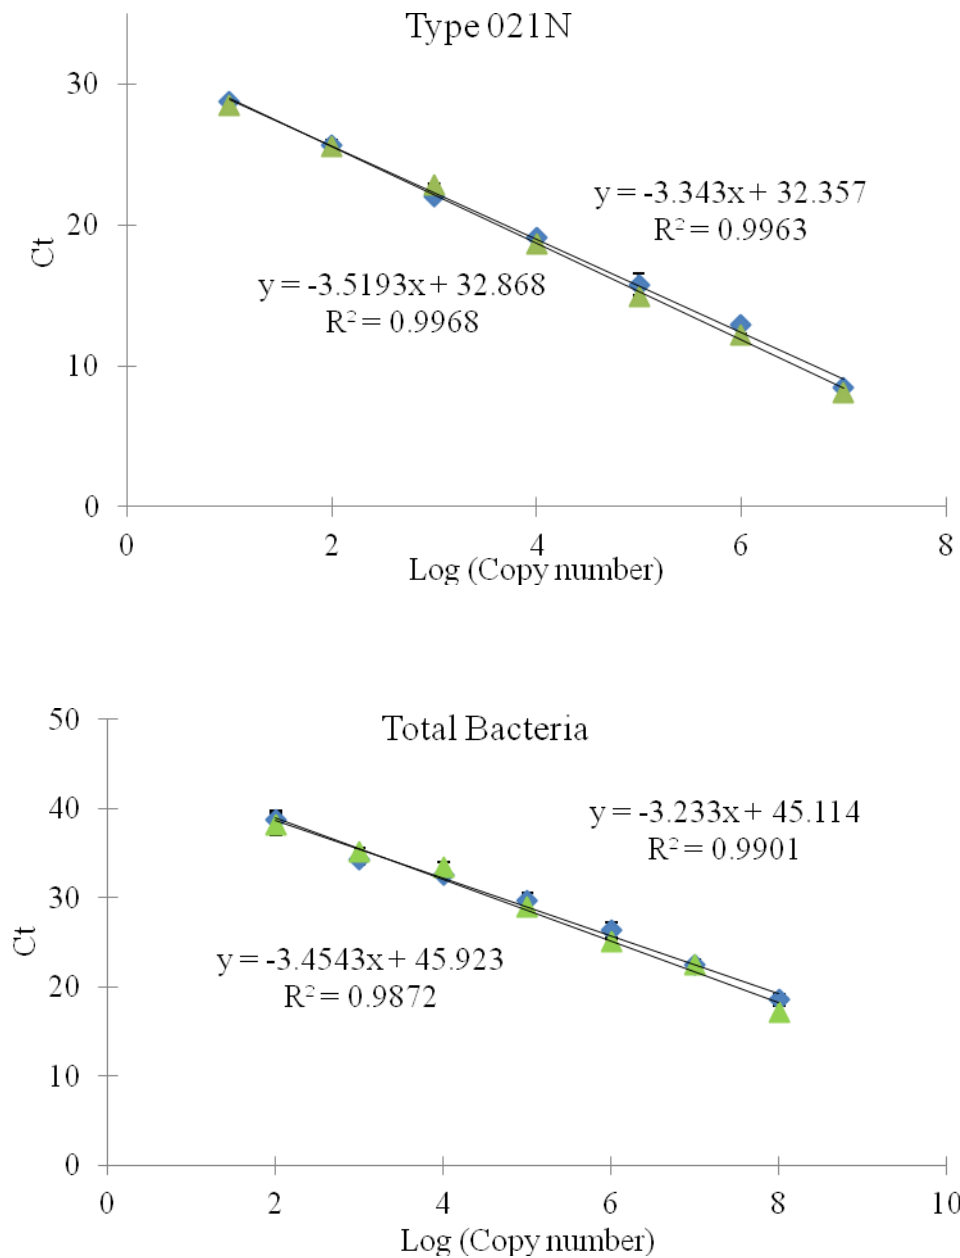

Figure S1. qPCR standard curves for Type 021N and total bacteria in the presence (◆) and absence (▲) of EDTA and  $MgCl_2$  in PCR reactions. Error bars represent one standard deviation from the mean of triplicate samples.

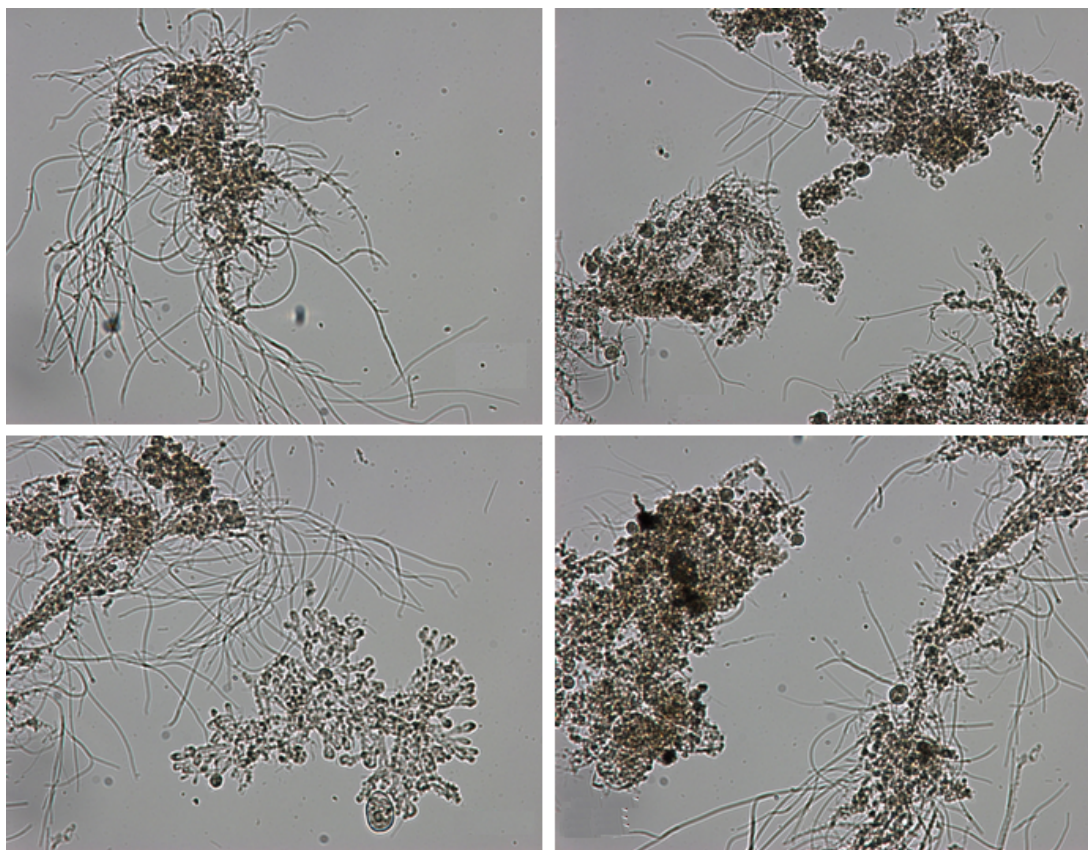

Figure S2. Micrographs of light microscopy of activated sludge samples from Tank #1 (left panel) and Tank #2 (right panel) taken on day 80 and 100, respectively.

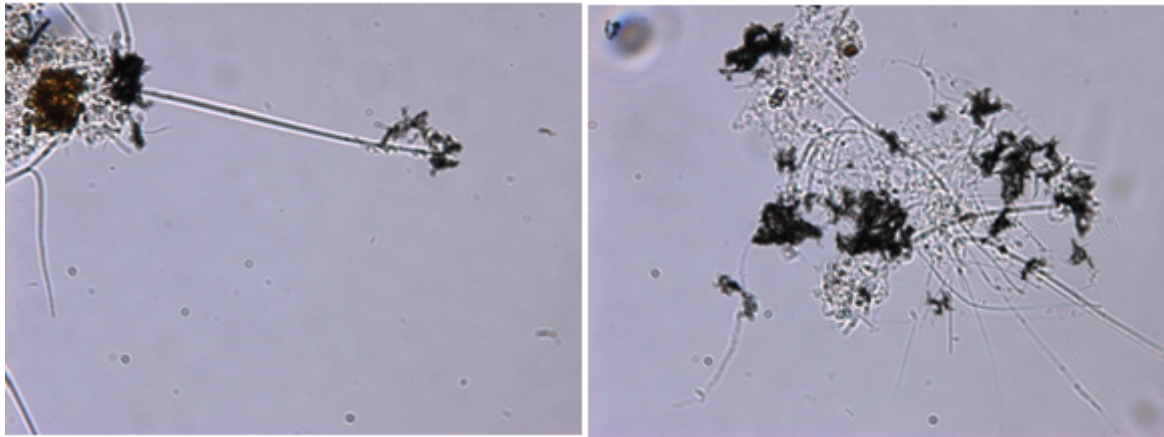

Figure S3. Micrographs of light microscopy of activated sludge samples from Tank #1 (left panel) and Tank #2 (right panel) taken 1 h after NZVI dosing in the MLE systems with agglomerated NZVI structure shown in black.

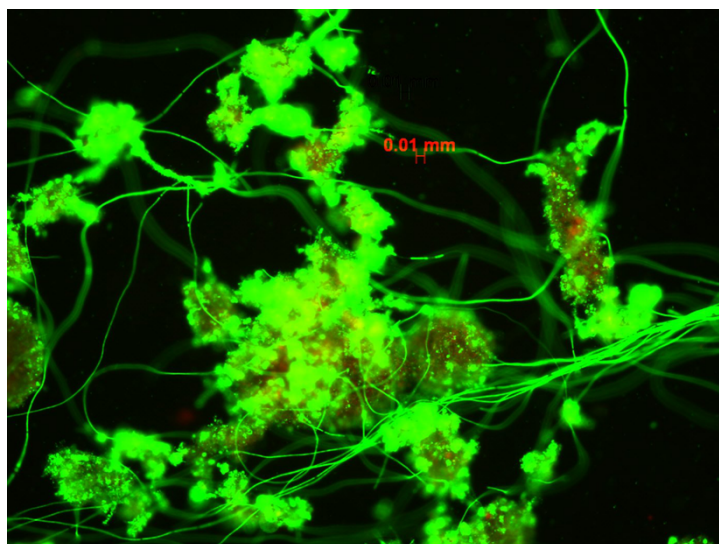

Figure S4. The viability of bulking activated sludge before NZVI treatment. Under fluorescence microscopy, living cells were stained green and dead cells were stained red.



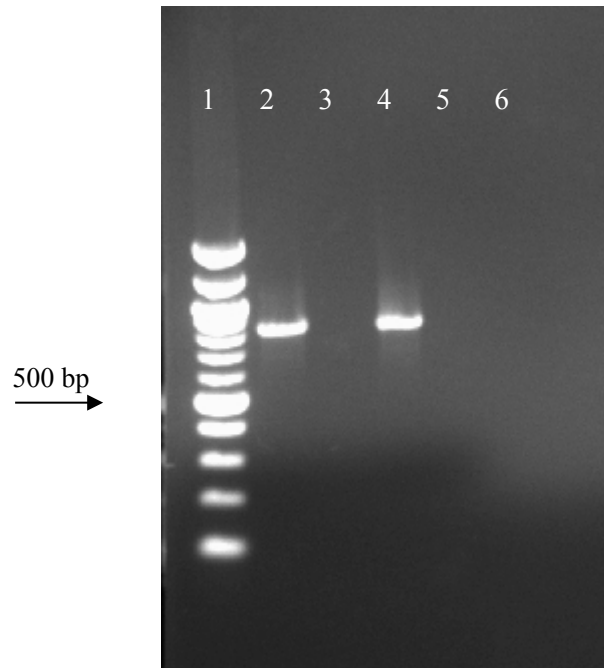

Figure S5. Conventional PCR analysis of the sludge samples targeting genomic DNA (829 bp) of *Gordonia* spp. Lane 1, molecular mass marker (100 bp plus DNA ladder); Lane 2, DNA template from Tank #1 before NZVI dosing; Lane 3, DNA template from Tank #1 one day after NZVI dosing; Lane 4, DNA template from Tank #2 before NZVI dosing; Lane 5, DNA template from Tank #2 one day after NZVI dosing; Lane 6, negative control (no DNA template).

(a)

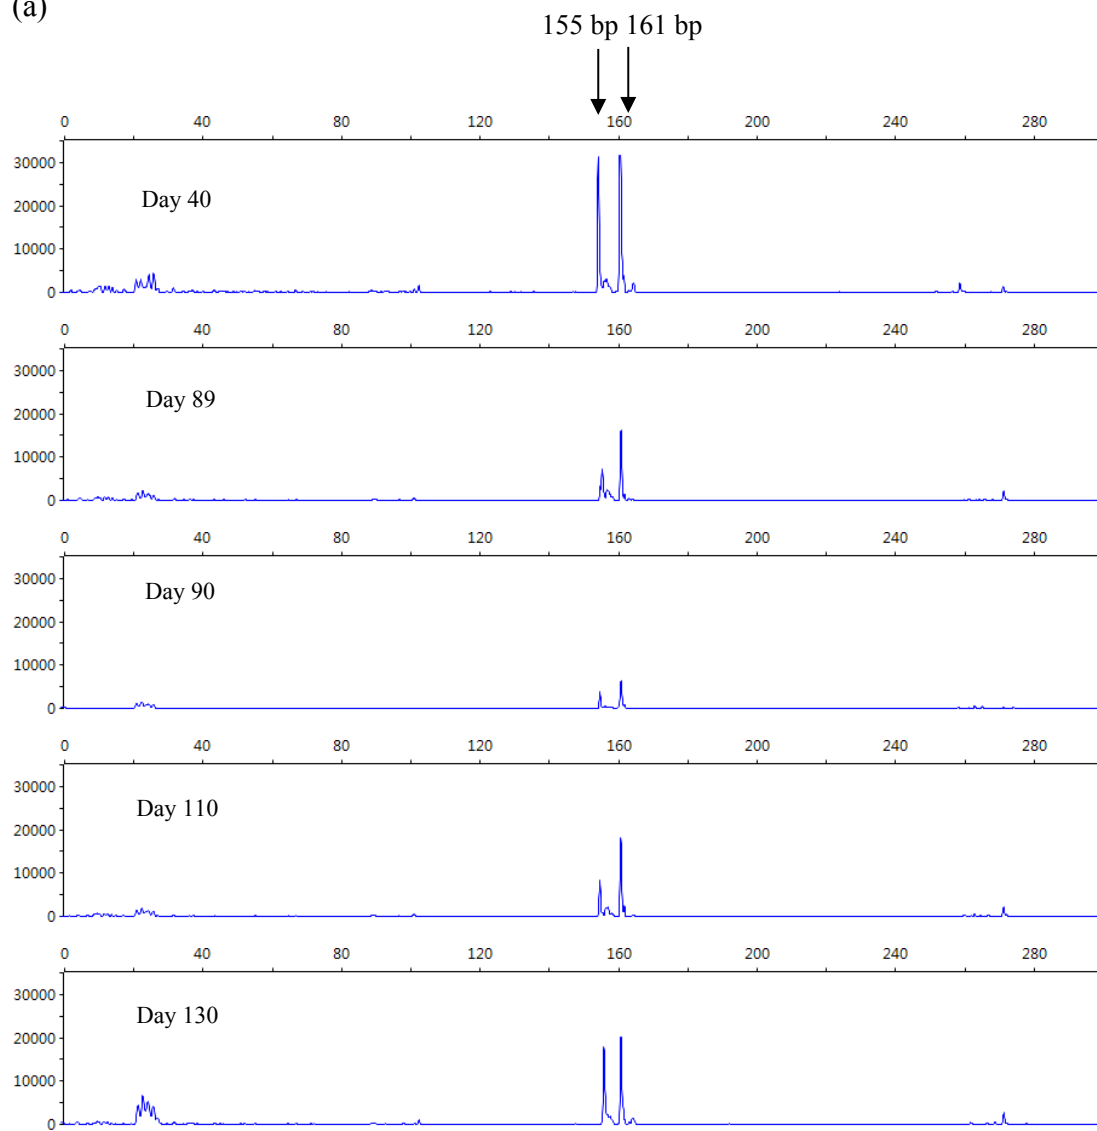

(b)

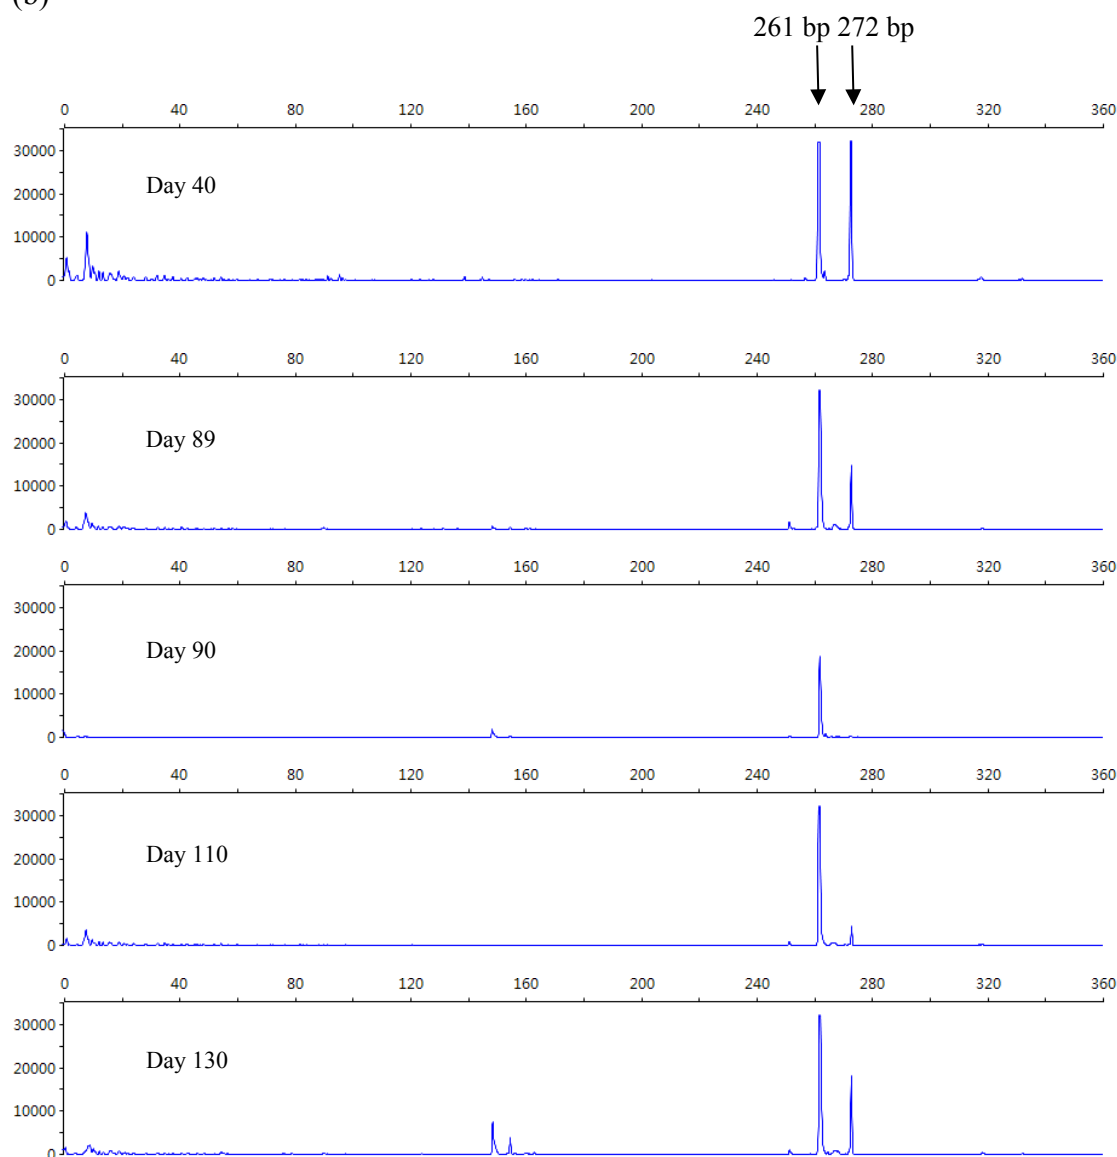

Figure S6. Nitrifying bacterial community composition reflected by T-RFLP profiles targeting 16S rRNA genes of *Nitrosomonas* (a) and *Nitrospira* (b) in Tank #1 before and after NZVI dosing on day 89. Arrows indicate significant T-RFLPs of AOB: 161bp for AOB Group-1 and 155 bp could belong to the uncharacterized AOB. Arrows also correspond to significant T-RFLPs of *Nitrospira*, 261 bp, and 272 bp.

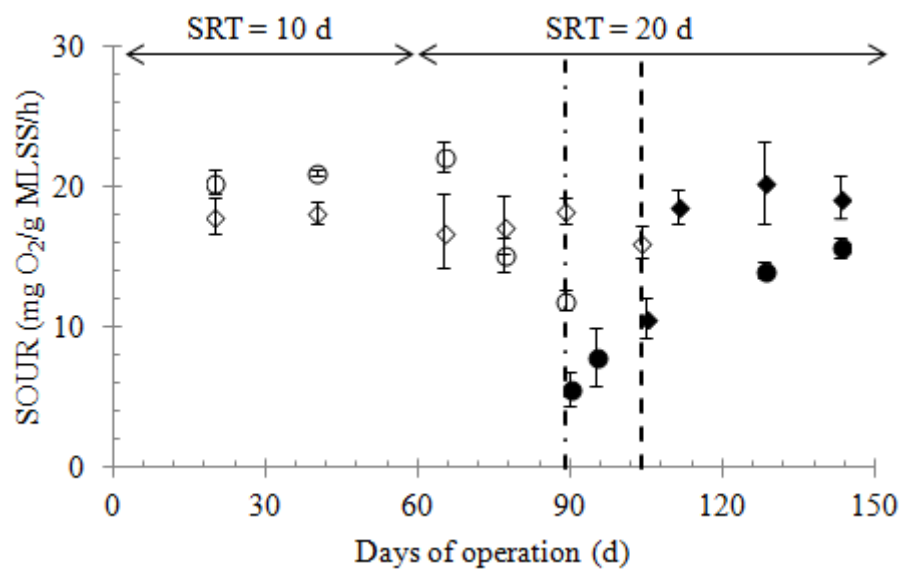

Figure S7. Autotrophic SOUR in Tank #1 (○) and #2 (◇) before NZVI dosing and in Tank #1 (●) and #2 (◆) after NZVI dosing on day 89 and day 104, respectively. Two vertical hashed lines show the days of NZVI addition in Tanks #1 and #2, respectively.

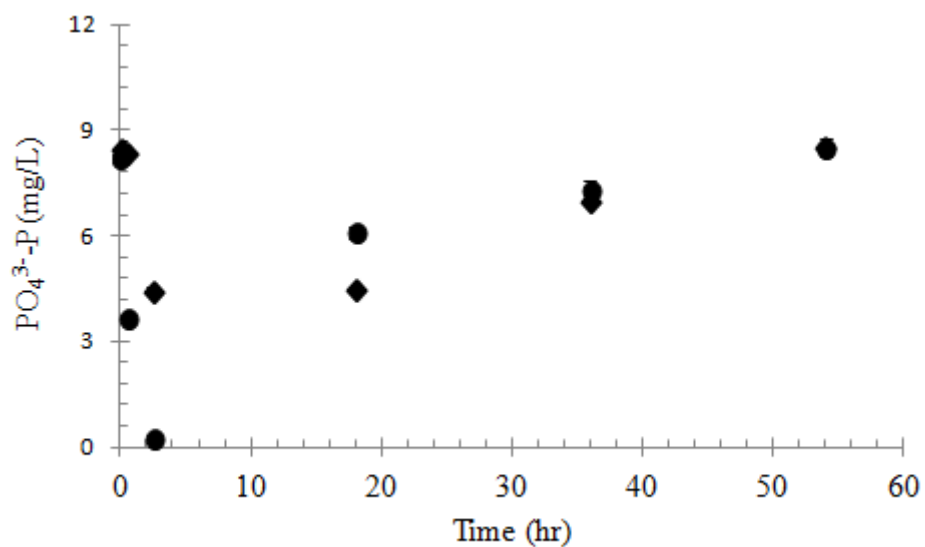

Figure S8. Effluent  $\text{PO}_4^{3-}\text{-P}$  concentrations in Tank #1 (●) and Tank #2 (◆) right after NZVI dosing. Error bars represent one standard deviation from the mean of duplicate samples.

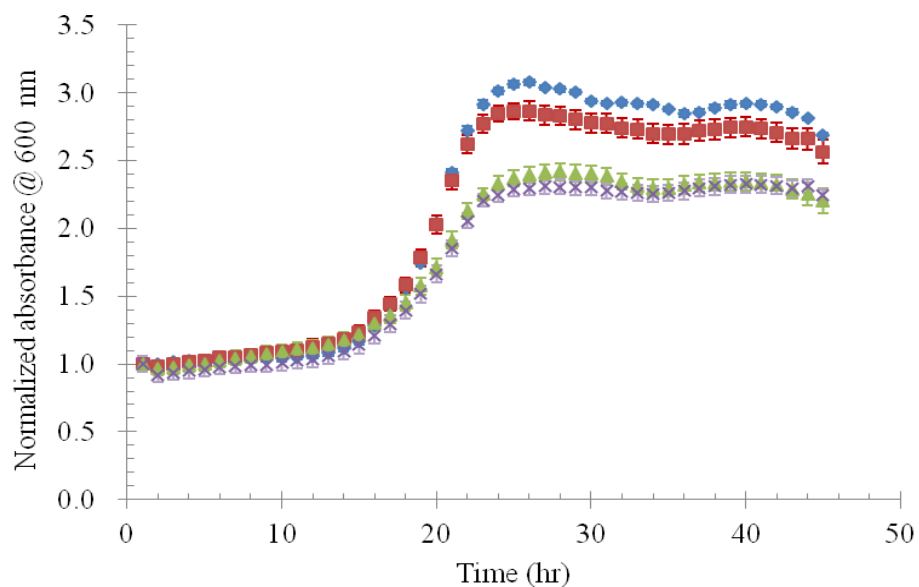

Figure S9. Aerobic bacterial growth, as indicated by optical density measurements at 600 nm, in the groups treated with different NZVI concentrations: Control (♦), 20 mg/L (■), 100 mg/L (▲) and 200 mg/L (×). Activated sludge from the Columbia WWTP was used as a seed culture. The error bars represent one standard error of the mean (n = 8).

## Methods

### 1. Detailed procedures of PCR

PCR reactions were carried out in MicroAmp optical reaction plates (Applied Biosystems, Branchburg, NJ) containing 1  $\mu$ L of each forward primer and reverse primer (stock concentration of 10  $\mu$ M), 12.5  $\mu$ L of SYBR Green PCR master Mix (Applied Biosystems, CA), 1.25  $\mu$ L EDTA (10 mM), 0.5  $\mu$ L MgCl<sub>2</sub> (25 mM), 3.75  $\mu$ L of PCR water, and 5  $\mu$ L sample DNA (a total of 4.3–11.6 ng DNA) in a 25  $\mu$ L total volume. The qPCR reactions were performed starting at 50 °C for 2 min, followed by an initial denaturation at 95 °C for 10 min, and then 40 cycles of 95 °C for 15 s and 62 °C for 1 min. The dissociation step at 95 °C for 15 s and 60 °C for 1 min was added at the end to check the specificity of the PCR results (SI Table S3). For comparison purposes, qPCR was also applied to quantify total bacterial 16S rRNA gene copy number using primers 1055f and 1392r (SI Table S1). To reduce potential false-positive signals in total bacterial count, TaqMan-based detection was applied and the TaqMan probe 16S Taq1115 (6-FAM)-CAACGAGCGCAACCC-(TAMRA) was modified from the 1114f primer. The PCR Mix had a total volume of 25  $\mu$ L consisting of 12.5  $\mu$ L of TaqMan Universal PCR Master Mix (Applied Biosystems, CA), 1  $\mu$ L of each forward primer and reverse primer (stock concentration of 20  $\mu$ M), 0.5  $\mu$ L of TaqMan probe, 1.25  $\mu$ L EDTA (10 mM), 0.5  $\mu$ L MgCl<sub>2</sub> (25 mM), 3.25  $\mu$ L of PCR water, and 5  $\mu$ L sample DNA.

The program for 16S rRNA gene amplification was set as follows: 10 min at 95 °C, 45 cycles of 30 s at 95 °C, 60 s at 50 °C, and 45 s at 72 °C.

## **2. NZVI toxicity evaluation**

A turbidimetric microtiter assay was applied to evaluate the toxicity of NZVI on the growth of active sludge bacteria (at the concentration of about 2000 mg/L of biomass COD) at different concentrations (20, 100 and 200 mg Fe/L). Activated sludge samples from the Columbia WWTPs were washed with  $1 \times$  phosphate buffered saline (PBS) three times to remove the residue organic matter and nutrients before use. Aliquots (20  $\mu$ L) of sludge samples in 8 replicates were added to the microplate wells followed by the addition of 180  $\mu$ L sterile basal mineral medium in each well. The absorbance of cell culture in each microwell was measured at 600 nm every 1 hour for about 48 h by a microreader (VICTOR3, PerkinElmer, Shelton, USA). Activated sludge sample with no NZVI treatment served as control.

## **3. SOUR measurement**

Aliquots (120 mL) of biomass sample were collected from the aeration chamber of each bioreactor and poured into two 50 mL respirometric bottles. After 3 min of aeration with pure oxygen gas, the respirometric bottles were tightly capped with no air space. MOPs (3-(N-morpholino) propanesulfonic acid) were added at a final concentration of 20 mM to maintain a constant pH at 7.5. At a predetermined time, an aliquot of substrate (10 mg N/L  $\text{NH}_4^+\text{-N}$ ) was injected using a 10- $\mu$ L syringe. A decrease of dissolved oxygen (DO) level in the respirometric bottles due to substrate oxidation was measured by the DO probe and continuously monitored at 4 Hz by an interfaced computer. Oxygen uptake rates were calculated based on a linear regression analysis because zero-order reactions were observed



for a long period of time. SOUR was calculated by dividing OUR by biomass concentration of each sample. All SOUR experiments were carried out in at least duplicate.

## Results

Figure S9 shows bacterial growth curves in the presence of NZVI using a microtiter assay. Compared with the control having the specific bacterial growth rate of  $2.36 \pm 0.37 \text{ d}^{-1}$ , the presence of NZVI at 20, 100 and 200 mg/L reduced the specific growth rates to  $2.16 \pm 0.52 \text{ d}^{-1}$ ,  $1.61 \pm 0.28 \text{ d}^{-1}$  and  $1.59 \pm 0.43 \text{ d}^{-1}$ , respectively. By increasing the NZVI concentration from 20 to 100 mg/L, the reduction in bacterial growth was increased from 8% to 32%. However, further reduction was not observed when NZVI concentration was increased to 200 mg/L. Therefore, an instantaneous, one-time dose of NZVI at the final concentration of 100 mg Fe/L in the mixed liquor was applied in the MLE bioreactors for sludge bulking control.
